# Supplementary material for: Comparison of the Psychological Impact of COVID-19 on Self-Employed Private Healthcare Workers with Respect to Employed Public Healthcare Workers: Three-Wave Study during the COVID-19 Pandemic in Spain
Source: MDPI journal article supplement (doi:10.3390/healthcare11010134), 2022-12-31
Supplement: s1 [file s1]

**Table S1.** Valuation of the level of anxiety.

| First wave\$                                                                   | Self-employed private n=247 |            |            |            |              | Employed public n=270 |             |            |            |              |         |
|--------------------------------------------------------------------------------|-----------------------------|------------|------------|------------|--------------|-----------------------|-------------|------------|------------|--------------|---------|
| Perceived anxiety (ASRI)                                                       | Almost always               | Often      | At times   | Not often  | Almost never | Almost always         | Often       | At times   | Not often  | Almost never | p value |
| 1. Concerned about the COVID-19                                                | 52.0(n=129)                 | 32.7(n=81) | 11.9(n=29) | 3.5(n=8)   | 0.0(n=0)     | 51.1(n=138)           | 43.3(n=117) | 5.6(n=15)  | 0.0(n=0)   | 0.0(n=0)     | .389    |
| 2. Negative thoughts or feelings about myself                                  | 14.9(n=37)                  | 29.2(n=72) | 34.7(n=86) | 13.9(n=34) | 7.4(n=18)    | 16.7(n=45)            | 31.5(n=85)  | 33.0(n=89) | 15.2(n=41) | 3.7(n=10)    | .300    |
| 3. Fear of my anxiety being noticed and what people will think if that happens | 10.4(n=26)                  | 17.8(n=44) | 23.8(n=59) | 15.3(n=38) | 32.7(n=81)   | 18.1(n=49)            | 27.4(n=74)  | 21.1(n=57) | 16.7(n=45) | 16.7(n=45)   | .001*** |
| 4. Stomach problems                                                            | 4.0(n=10)                   | 10.4(n=26) | 20.3(n=50) | 12.9(n=32) | 52.5(n=130)  | 17.7(n=37)            | 27.0(n=73)  | 21.1(n=57) | 11.5(n=31) | 26.7(n=72)   | .001*** |
| 5. Perspiration                                                                | 0.5(n=1)                    | 5.9(n=15)  | 12.9(n=32) | 12.9(n=32) | 67.8(n=167)  | 12.2(n=33)            | 18.1(n=49)  | 21.5(n=58) | 14.4(n=39) | 33.7(n=91)   | .001*** |
| 6. Tremors                                                                     | 0.0(n=0)                    | 2.0(n=5)   | 8.4(n=21)  | 11.9(n=29) | 77.7(n=192)  | 6.3(n=17)             | 8.9(n=24)   | 18.1(n=49) | 16.3(n=44) | 50.4(n=136)  | .001*** |
| 7. Tension                                                                     | 8.4(n=21)                   | 16.8(n=42) | 20.3(n=50) | 13.9(n=34) | 40.6(n=100)  | 24.4(n=66)            | 34.4(n=93)  | 18.5(n=50) | 10.7(n=29) | 11.9(n=32)   | .001*** |
| 8. Palpitations, rapid heartbeat                                               | 6.9(n=17)                   | 10.4(n=26) | 17.8(n=44) | 15.8(n=39) | 49.0(n=121)  | 16.3(n=44)            | 23.0(n=62)  | 20.7(n=56) | 16.7(n=45) | 23.3(n=63)   | .001*** |
| 9. Repetitive movements (feet, hands, scratching)                              | 5.0(n=12)                   | 14.4(n=36) | 13.9(n=34) | 12.9(n=32) | 54.0(n=133)  | 10.7(n=29)            | 23.3(n=63)  | 19.6(n=53) | 15.9(n=43) | 30.4(n=82)   | .001*** |
| 10. Smoking, eating, or drinking excessively                                   | 12.9(n=32)                  | 12.4(n=37) | 19.3(n=48) | 19.8(n=49) | 35.6(n=88)   | 19.3(n=52)            | 20.7(n=56)  | 17.0(n=46) | 17.4(n=47) | 25.6(n=59)   | .001*** |
| 11. Avoiding situations                                                        | 18.3(n=45)                  | 24.8(n=61) | 20.8(n=51) | 16.8(n=41) | 19.3(n=48)   | 10.7(n=29)            | 21.9(n=59)  | 23.3(n=63) | 21.9(n=59) | 22.2(n=60)   | .022**  |

|                                                                                |                                    |            |            |            |                 |                              |            |            |            |                 |         |
|--------------------------------------------------------------------------------|------------------------------------|------------|------------|------------|-----------------|------------------------------|------------|------------|------------|-----------------|---------|
| 12. Insecurity                                                                 | 0.0(n=0)                           | 26.7(n=66) | 28.2(n=70) | 25.7(n=63) | 19.3(n=48)      | 27.8(n=75)                   | 26.7(n=72) | 22.6(n=61) | 12.6(n=34) | 10.4(n=28)      | .001*** |
| <b>Second Wave</b>                                                             | <b>Self-employed private n=141</b> |            |            |            |                 | <b>Employed public n=147</b> |            |            |            |                 |         |
|                                                                                | Almost<br>always                   | Often      | At times   | Not often  | Almost<br>never | Almost<br>always             | Often      | At times   | Not often  | Almost<br>never | p value |
| 1. Concerned about the COVID-19                                                | 33.3(n=47)                         | 42.6(n=60) | 20.6(n=29) | 3.5(n=5)   | 0.0(n=0)        | 36.2(n=53)                   | 51.8(n=76) | 10.6(n=16) | 1.4(n=2)   | 0.0(n=0)        | .106    |
| 2. Negative thoughts and feelings about myself                                 | 8.5(n=12)                          | 25.5(n=36) | 38.3(n=54) | 18.4(n=26) | 9.2(n=13)       | 14.2(n=21)                   | 30.5(n=45) | 36.9(n=54) | 14.2(n=21) | 4.3(n=6)        | .020**  |
| 3. Fear of my anxiety being noticed and what people will think if that happens | 7.1(n=10)                          | 11.3(n=16) | 27.7(n=39) | 31.0(n=22) | 31.9(n=45)      | 12.8(n=19)                   | 29.8(n=44) | 19.9(n=29) | 19.9(n=29) | 17.7(n=26)      | .001*** |
| 4. Stomach problems                                                            | 2.1(n=3)                           | 8.5(n=12)  | 17.0(n=24) | 19.1(n=27) | 53.2(n=75)      | 5.7(n=8)                     | 31.2(n=46) | 27.0(n=40) | 11.3(n=16) | 24.8(n=37)      | .001*** |
| 5. Perspiration                                                                | 2.1(n=3)                           | 2.8(n=4)   | 10.6(n=15) | 14.2(n=20) | 70.2(n=99)      | 5.0(n=7)                     | 24.1(n=35) | 24.1(n=35) | 15.6(n=24) | 31.2(n=46)      | .001*** |
| 6. Tremors                                                                     | 1.4(n=2)                           | 2.8(n=4)   | 5.0(n=7)   | 14.2(n=20) | 76.6(n=108)     | 2.8(n=4)                     | 12.1(n=18) | 16.3(n=24) | 16.3(n=24) | 52.5(n=77)      | .001*** |
| 7. Tension                                                                     | 2.8(n=4)                           | 11.3(n=16) | 19.9(n=28) | 17.0(n=24) | 48.9(n=69)      | 18.4(n=27)                   | 36.9(n=56) | 19.9(n=29) | 12.1(n=17) | 12.8(n=18)      | .001*** |
| 8. Palpitations, rapid heartbeat                                               | 2.8(n=4)                           | 10.6(n=15) | 13.5(n=19) | 19.1(n=27) | 53.9(n=76)      | 12.8(n=18)                   | 23.4(n=34) | 23.4(n=34) | 14.2(n=21) | 26.2(n=39)      | .001*** |
| 9. Repetitive movements (feet, hands, scratching)                              | 3.5(n=5)                           | 8.5(n=12)  | 16.3(n=23) | 13.5(n=19) | 58.2(n=82)      | 7.1(n=10)                    | 24.1(n=36) | 25.5(n=37) | 11.3(n=17) | 31.9(n=47)      | .001*** |
| 10. Smoking, eating, or drinking excessively                                   | 5.0(n=7)                           | 12.8(n=18) | 29.1(n=41) | 22.7(n=32) | 30.5(n=43)      | 18.4(n=27)                   | 22.7(n=34) | 17.0(n=25) | 19.9(n=29) | 22.0(n=32)      | .001*** |
| 11. Avoiding situations                                                        | 10.6(n=15)                         | 29.6(n=29) | 21.3(n=30) | 20.6(n=29) | 38.0(n=27)      | 7.1(n=10)                    | 21.3(n=32) | 24.1(n=35) | 22.7(n=33) | 24.8(n=37)      | .849    |

|                |           |            |            |            |            |            |            |            |            |            |         |
|----------------|-----------|------------|------------|------------|------------|------------|------------|------------|------------|------------|---------|
| 12. Insecurity | 9.2(n=13) | 17.0(n=24) | 27.0(n=38) | 22.0(n=31) | 24.8(n=35) | 19.9(n=30) | 32.6(n=48) | 19.9(n=29) | 15.6(n=23) | 12.1(n=17) | .001*** |
|----------------|-----------|------------|------------|------------|------------|------------|------------|------------|------------|------------|---------|

| Third Wave $\alpha$                                                            | Self-employed private n=137 |            |            |            |              | Employed public n=131 |            |            |            |              | <i>p</i> value |
|--------------------------------------------------------------------------------|-----------------------------|------------|------------|------------|--------------|-----------------------|------------|------------|------------|--------------|----------------|
|                                                                                | Almost always               | Often      | At times   | Not often  | Almost never | Almost always         | Often      | At times   | Not often  | Almost never |                |
| 1. Concerned about the COVID-19                                                | 52.0(n=105)                 | 46.0(n=63) | 13.1(n=18) | 2.9(n=4)   | 0.0(n=0)     | 27.3(n=36)            | 47.0(n=62) | 25.0(n=33) | 0.8(n=1)   | 0.0(n=0)     | .028**         |
| 2. Negative thoughts or feelings about myself                                  | 8.0(n=11)                   | 25.5(n=35) | 34.3(n=47) | 24.8(n=34) | 7.3(n=10)    | 8.3(n=11)             | 35.6(n=47) | 35.6(n=47) | 15.9(n=21) | 4.5(n=6)     | .037**         |
| 3. Fear of my anxiety being noticed and what people will think if that happens | 5.1(n=7)                    | 13.9(n=19) | 26.3(n=36) | 22.6(n=31) | 32.1(n=44)   | 10.6(n=14)            | 31.1(n=41) | 27.3(n=36) | 15.9(n=21) | 15.2(n=20)   | .001***        |
| 4. Stomach problems                                                            | 5.8(n=8)                    | 14.6(n=20) | 12.4(n=17) | 21.2(n=29) | 46.0(n=63)   | 11.4(n=15)            | 23.5(n=31) | 23.5(n=31) | 13.6(n=18) | 28.0(n=37)   | .001***        |
| 5. Perspiration                                                                | 2.9(n=4)                    | 12.4(n=17) | 10.2(n=14) | 13.9(n=19) | 60.6(n=83)   | 6.8(n=9)              | 19.7(n=26) | 22.7(n=30) | 14.4(n=19) | 36.4(n=48)   | .001***        |
| 6. Tremors                                                                     | 0.7(n=1)                    | 0.7(n=1)   | 11.0(n=8)  | 13.9(n=19) | 76.6(n=105)  | 3.8(n=5)              | 6.8(n=9)   | 23.5(n=31) | 18.2(n=24) | 47.7(n=63)   | .001***        |
| 7. Tension                                                                     | 7.3(n=10)                   | 10.2(n=14) | 24.8(n=34) | 21.9(n=30) | 35.8(n=49)   | 18.9(n=25)            | 35.6(n=47) | 23.5(n=31) | 11.4(n=15) | 10.6(n=14)   | .001***        |
| 8. Palpitations, rapid heartbeat                                               | 3.6(n=5)                    | 12.4(n=17) | 15.3(n=21) | 16.1(n=22) | 52.6(n=72)   | 12.9(n=17)            | 25.0(n=33) | 22.0(n=29) | 19.7(n=26) | 20.5(n=27)   | .001***        |
| 9. Repetitive movements (feet, hands, scratching)                              | 5.8(n=8)                    | 8.8(n=12)  | 14.6(n=20) | 16.8(n=23) | 54.0(n=74)   | 8.3(n=11)             | 22.0(n=29) | 20.5(n=27) | 21.2(n=28) | 28.0(n=37)   | .001***        |
| 10. Smoking, eating or drinking excessively                                    | 5.1(n=7)                    | 19.0(n=26) | 13.9(n=19) | 24.1(n=33) | 38.0(n=52)   | 12.9(n=17)            | 19.7(n=26) | 22.0(n=29) | 16.7(n=22) | 28.8(n=38)   | .015**         |
| 11. Avoiding situations                                                        | 12.4(n=17)                  | 24.8(n=34) | 28.5(n=39) | 22.6(n=31) | 11.7(n=16)   | 11.4(n=15)            | 22.0(n=29) | 24.2(n=32) | 23.5(n=31) | 18.9(n=25)   | .186           |

---

|                |          |            |            |            |            |            |            |            |            |           |         |
|----------------|----------|------------|------------|------------|------------|------------|------------|------------|------------|-----------|---------|
| 12. Insecurity | 5.8(n=8) | 19.7(n=27) | 29.2(n=40) | 24.1(n=33) | 21.2(n=29) | 18.9(n=25) | 29.5(n=39) | 30.3(n=40) | 12.1(n=16) | 9.1(n=12) | .001*** |
|----------------|----------|------------|------------|------------|------------|------------|------------|------------|------------|-----------|---------|

---

Note: Chi-square test is applied. Significance set at  $p < 0.05$ . \*  $p < 0,05$ ; \*\*  $p < 0,01$ ; \*\*\*  $p < 0,001$ . From March to June of 2020\$; From September to November of 2020 £ ;From January to March of 2021  $\alpha$ .

Table S2: STROBE Statement—checklist of items that should be included in reports of observational studies

|                      | Item No | Recommendation                                                                                                                                                                                                                                                                                                                                                                                                                                 | Page No |
|----------------------|---------|------------------------------------------------------------------------------------------------------------------------------------------------------------------------------------------------------------------------------------------------------------------------------------------------------------------------------------------------------------------------------------------------------------------------------------------------|---------|
| Title and abstract   | 1       | (a) Indicate the study’s design with a commonly used term in the title or the abstract                                                                                                                                                                                                                                                                                                                                                         | 1       |
|                      |         | (b) Provide in the abstract an informative and balanced summary of what was done and what was found                                                                                                                                                                                                                                                                                                                                            |         |
| Introduction         |         |                                                                                                                                                                                                                                                                                                                                                                                                                                                |         |
| Background/rationale | 2       | Explain the scientific background and rationale for the investigation being reported                                                                                                                                                                                                                                                                                                                                                           | 1-2     |
| Objectives           | 3       | State specific objectives, including any prespecified hypotheses                                                                                                                                                                                                                                                                                                                                                                               | 2       |
| Methods              |         |                                                                                                                                                                                                                                                                                                                                                                                                                                                |         |
| Study design         | 4       | Present key elements of study design early in the paper                                                                                                                                                                                                                                                                                                                                                                                        | 3       |
| Setting              | 5       | Describe the setting, locations, and relevant dates, including periods of recruitment, exposure, follow-up, and data collection                                                                                                                                                                                                                                                                                                                | 3       |
| Participants         | 6       | (a) Cohort study—Give the eligibility criteria, and the sources and methods of selection of participants. Describe methods of follow-up<br>Case-control study—Give the eligibility criteria, and the sources and methods of case ascertainment and control selection. Give the rationale for the choice of cases and controls<br>Cross-sectional study—Give the eligibility criteria, and the sources and methods of selection of participants | 3       |
|                      |         | (b) Cohort study—For matched studies, give matching criteria and number of exposed and unexposed<br>Case-control study—For matched studies, give matching criteria and the number of controls per case                                                                                                                                                                                                                                         |         |
| Variables            | 7       | Clearly define all outcomes, exposures, predictors, potential confounders, and effect modifiers. Give diagnostic criteria, if applicable                                                                                                                                                                                                                                                                                                       | 4       |

|                              |    |                                                                                                                                                                                                                                                                                                           |   |
|------------------------------|----|-----------------------------------------------------------------------------------------------------------------------------------------------------------------------------------------------------------------------------------------------------------------------------------------------------------|---|
| Data sources/<br>measurement | 8* | For each variable of interest, give sources of data and details of methods of assessment (measurement). Describe comparability of assessment methods if there is more than one group                                                                                                                      | 4 |
| Bias                         | 9  | Describe any efforts to address potential sources of bias                                                                                                                                                                                                                                                 |   |
| Study size                   | 10 | Explain how the study size was arrived at                                                                                                                                                                                                                                                                 |   |
| Quantitative variables       | 11 | Explain how quantitative variables were handled in the analyses. If applicable, describe which groupings were chosen and why                                                                                                                                                                              |   |
| Statistical methods          | 12 | (a) Describe all statistical methods, including those used to control for confounding                                                                                                                                                                                                                     | 3 |
|                              |    | (b) Describe any methods used to examine subgroups and interactions                                                                                                                                                                                                                                       |   |
|                              |    | (c) Explain how missing data were addressed                                                                                                                                                                                                                                                               |   |
|                              |    | (d) <i>Cohort study</i> —If applicable, explain how loss to follow-up was addressed<br><i>Case-control study</i> —If applicable, explain how matching of cases and controls was addressed<br><i>Cross-sectional study</i> —If applicable, describe analytical methods taking account of sampling strategy | 3 |
|                              |    | (e) Describe any sensitivity analyses                                                                                                                                                                                                                                                                     | 4 |

## Results

|                  |     |                                                                                                                                                                                                   |   |
|------------------|-----|---------------------------------------------------------------------------------------------------------------------------------------------------------------------------------------------------|---|
| Participants     | 13* | (a) Report numbers of individuals at each stage of study—eg numbers potentially eligible, examined for eligibility, confirmed eligible, included in the study, completing follow-up, and analysed | 3 |
|                  |     | (b) Give reasons for non-participation at each stage                                                                                                                                              | 3 |
|                  |     | (c) Consider use of a flow diagram                                                                                                                                                                | 3 |
| Descriptive data | 14* | (a) Give characteristics of study participants (eg demographic, clinical, social) and information on exposures and potential confounders                                                          | 5 |
|                  |     | (b) Indicate number of participants with missing data for each variable of interest                                                                                                               |   |
|                  |     | (c) <i>Cohort study</i> —Summarise follow-up time (eg, average and total amount)                                                                                                                  | 3 |

|                          |     |                                                                                                                                                                                                              |       |
|--------------------------|-----|--------------------------------------------------------------------------------------------------------------------------------------------------------------------------------------------------------------|-------|
| Outcome data             | 15* | <i>Cohort study</i> —Report numbers of outcome events or summary measures over time                                                                                                                          | 5-6   |
|                          |     | <i>Case-control study</i> —Report numbers in each exposure category, or summary measures of exposure                                                                                                         |       |
|                          |     | <i>Cross-sectional study</i> —Report numbers of outcome events or summary measures                                                                                                                           |       |
| Main results             | 16  | (a) Give unadjusted estimates and, if applicable, confounder-adjusted estimates and their precision (eg, 95% confidence interval). Make clear which confounders were adjusted for and why they were included | 5-10  |
|                          |     | (b) Report category boundaries when continuous variables were categorized                                                                                                                                    |       |
|                          |     | (c) If relevant, consider translating estimates of relative risk into absolute risk for a meaningful time period                                                                                             |       |
| Other analyses           | 17  | Report other analyses done—eg analyses of subgroups and interactions, and sensitivity analyses                                                                                                               |       |
| <b>Discussion</b>        |     |                                                                                                                                                                                                              |       |
| Key results              | 18  | Summarise key results with reference to study objectives                                                                                                                                                     | 11    |
| Limitations              | 19  | Discuss limitations of the study, taking into account sources of potential bias or imprecision. Discuss both direction and magnitude of any potential bias                                                   | 12    |
| Interpretation           | 20  | Give a cautious overall interpretation of results considering objectives, limitations, multiplicity of analyses, results from similar studies, and other relevant evidence                                   | 11    |
| Generalisability         | 21  | Discuss the generalisability (external validity) of the study results                                                                                                                                        | 11-12 |
| <b>Other information</b> |     |                                                                                                                                                                                                              |       |
| Funding                  | 22  | Give the source of funding and the role of the funders for the present study and, if applicable, for the original study on which the present article is based                                                | 12    |

\*Give information separately for cases and controls in case-control studies and, if applicable, for exposed and unexposed groups in cohort and cross-sectional studies.
